# Supplementary material for: Detection of Ochyromera ligustri (Coleoptera: Curculionidae: Curculioninae) in Ligustrum spp. (Oleaceae) Using Newly Developed PCR Primers
Source: MDPI journal article supplement (doi:10.3390/insects15050320), 2024-04-30
Supplement: s1 [file s1]

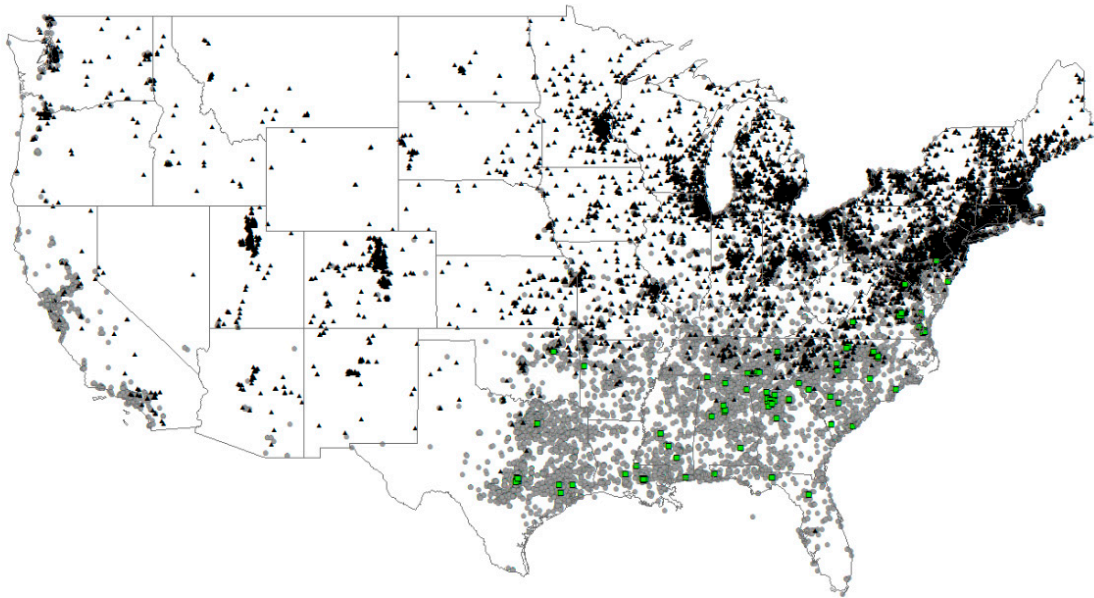

**Figure S1.** Distribution map of *O. ligustri*, *Ligustrum* spp., and *Syringa* spp. in the US. Green squares represent *O. ligustri*, gray dots represent *Ligustrum* spp., and black triangles represent *Syringa* spp.

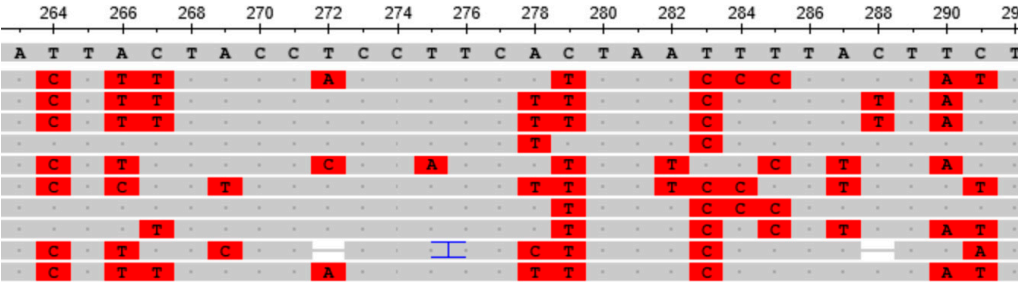

**Figure S2.** Gene region of a newly developed forward COI primer within 658-bp sequence of *O. ligustri* (263 to 289). MSA viewer showed the gene region is interspecifically highly diverse (red color).

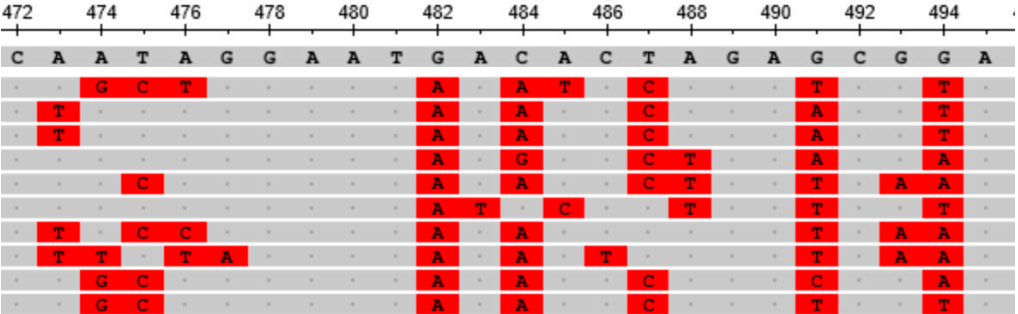

**Figure S3.** Gene region of a newly developed reverse COI primer within 658-bp of *O. ligustri* (473 to 494). MSA viewer showed the gene region is interspecifically highly diverse (red color).

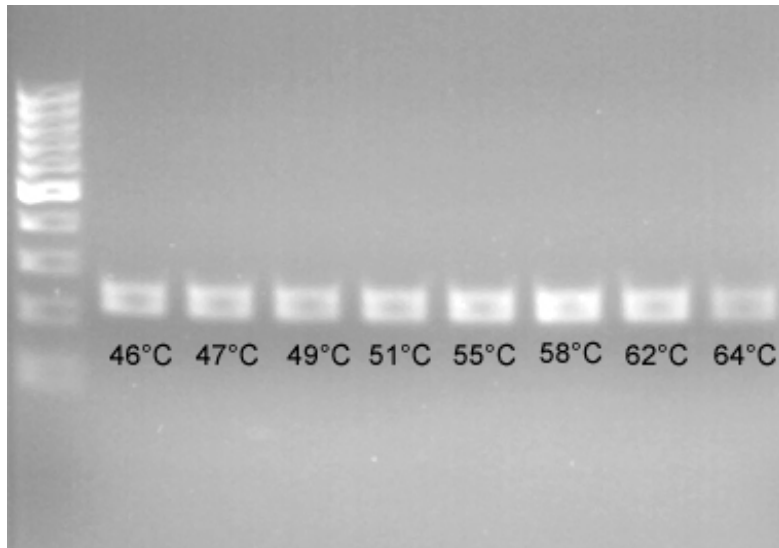

**Figure S4.** Gradient PCR results indicated that the newly developed species-specific primers worked best at the 58°C annealing temperature.

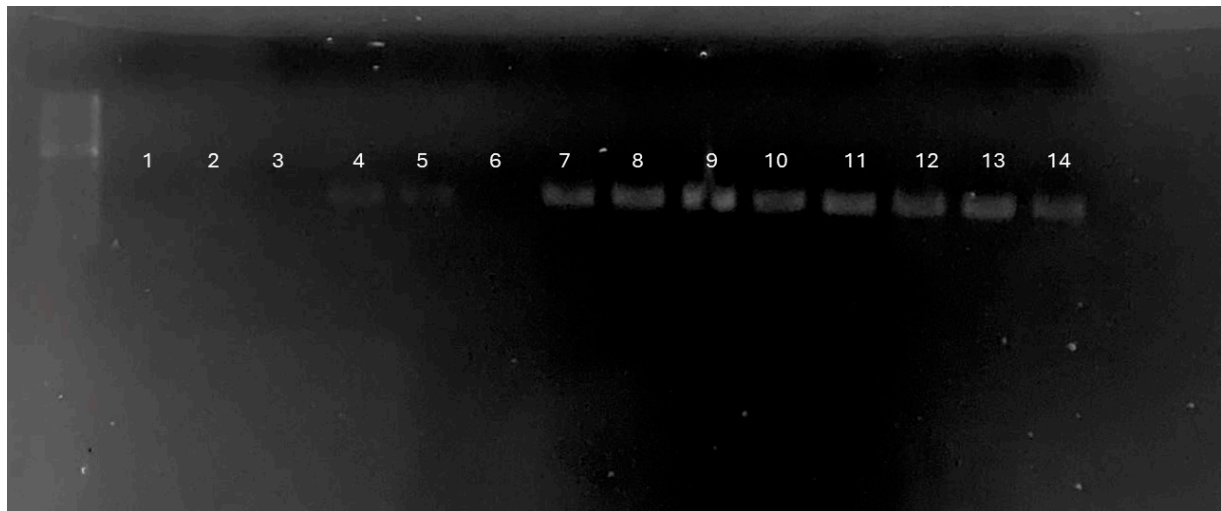

**Figure S5.** DNA detection results of *O. ligustri* from fruits and adults weevils: 1: *L. sinense* fruits (n =10; Houston Arboretum, Texas; absent); 2: *L. sinense* fruits (n = 10, High Isle, Texas; absent) 3: *L. sinense* fruits (n = 5; Tyrell, Texas; absent); 4: *L. sinense* fruits (n =5; Wesson, Mississippi; detected); 5: *L. sinense* berries (n = 10; Kathleen, Georgia; detected); 6: *L. sinense* fruits (n = 10; Spirewell Bluff, Georgia; absent); 7: *L. sinense* fruits (n = 5; Perry, Georgia; detected); 8: *O. ligustri* adult (n = 1; Wesson, Mississippi; detected); 9: *O. ligustri* adult (n = 1; Wesson, Mississippi; detected); 10: *O. ligustri* adult (n = 1; Auburn, Alabama; detected); 11: *O. ligustri* adult (n = 1; Auburn, Alabama; detected); 12: *O. ligustri* adult (n = 1; Louisiana, control 1; detected); 13: *O. ligustri* adult (n = 1; Louisiana, control 2; detected); 14: *O. ligustri* adult (n = 1; Louisiana, control 3; detected).

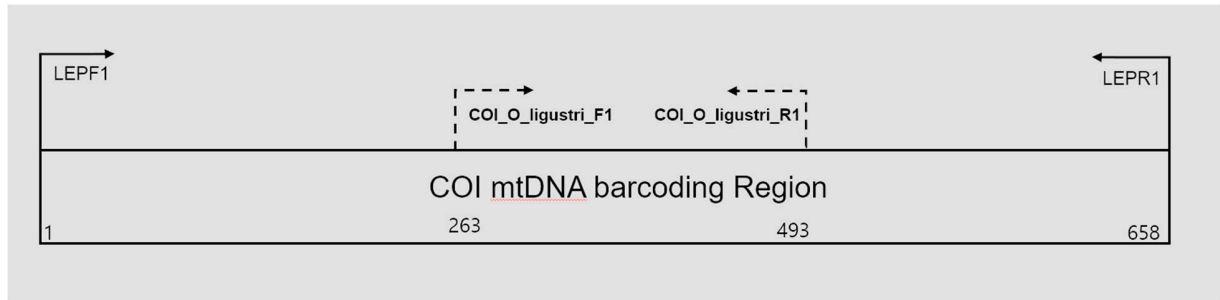

**Figure S6.** Positions of the newly developed primers on COI DNA barcoding region.

**Table S1.** Experimental setup to determine presence of *O. ligustri* DNA in *L. sinense* fruits in Louisiana.

|                            | # 1 | # 2 | # 3 | # 4 | # 5 | # 6 | # 7 | # 8 | # 9 | # 10 | # 11 | # 12 | # 13 | # 14 | # 15 | # 16 |
|----------------------------|-----|-----|-----|-----|-----|-----|-----|-----|-----|------|------|------|------|------|------|------|
| Number of fruits           | 1   | 2   | 1   | 1   | 10  | 10  | 10  | 10  | 10  | 10   | 10   | 10   | 10   | 10   | 10   | 10   |
| ATL buffer (μL)            | 180 | 180 | 270 | 270 | 900 | 900 | 900 | 900 | 900 | 900  | 900  | 900  | 900  | 900  | 900  | 900  |
| Proteinase K solution (μL) | 20  | 20  | 30  | 30  | 100 | 100 | 100 | 100 | 100 | 100  | 100  | 100  | 100  | 100  | 100  | 100  |
| AL Buffer (μL)             | 200 | 200 | 200 | 200 | 100 | 100 | 100 | 100 | 100 | 100  | 100  | 100  | 100  | 100  | 100  | 100  |
| 100% EtOH (μL)             | 200 | 200 | 200 | 200 | 100 | 100 | 100 | 100 | 100 | 100  | 100  | 100  | 100  | 100  | 100  | 100  |
| Fruit group                | i   | i   | i   | i   | ii  | ii  | ii  | ii  | i   | i    | i    | i    | iii  | iii  | iii  | iii  |
| Plant species              | Ch   | Ch   | Ch   | Ch   | Ch   | Ch   | Ch   |
| Site                       | A   | A   | A   | A   | A   | A   | A   | A   | A   | A    | A    | A    | A    | A    | A    | A    |

**Table S2.** Experimental setup to determine presence of *O. ligustri* DNA in three *Ligustrum* spp., *L. sinense* (Ch), *L. lucidum* (Tr) and *L. japonicum* (Ja) fruits in Louisiana.

|                            | # 1    | # 2    | # 3    | # 4    | # 5    | # 6    | # 7    | # 8    | # 9    | # 10   | # 11   | # 12   | # 13   | # 14   | # 15   |
|----------------------------|--------|--------|--------|--------|--------|--------|--------|--------|--------|--------|--------|--------|--------|--------|--------|
| Number of fruits           | 1      | 2      | 10     | 1      | 2      | 10     | 1      | 2      | 4      | 1      | 2      | 5      | 1      | 2      | 10     |
| ATL buffer (μL)            | 180    | 180    | 900    | 180    | 180    | 900    | 180    | 180    | 900    | 180    | 180    | 900    | 180    | 180    | 900    |
| Proteinase K solution (μL) | 20     | 20     | 100    | 20     | 20     | 100    | 20     | 20     | 100    | 20     | 20     | 100    | 20     | 20     | 100    |
| AL Buffer (μL)             | 200    | 200    | 100    | 200    | 200    | 100    | 200    | 200    | 100    | 200    | 200    | 100    | 200    | 200    | 100    |
| 100% EtOH (μL)             | 200    | 200    | 100    | 200    | 200    | 100    | 200    | 200    | 100    | 200    | 200    | 100    | 200    | 200    | 100    |
| Fruit group                | i & ii |
| Plant species              | Ch     | Ch     | Ch     | Ch     | Ch     | Ch     | Tr     | Tr     | Tr     | Tr     | Tr     | Tr     | Ja     | Ja     | Ja     |
| Site                       | A      | A      | A      | C      | C      | C      | C      | C      | C      | B      | B      | B      | B      | B      | B      |

**Table S3.** Experimental setup to determine presence of *O. ligustri* DNA in fruits of non-ligustrum plants, *Ardisia crenata* (Ca), *Sambucus* sp. (El), *Ilex vomitoria* (IL), *Nandina* sp. (Na), *L. sinense* (Ch).

|                  | # 1 | # 2 | # 3 | # 4 | # 5 | # 6 | # 7 | # 8 | # 9 | # 10 | # 11 | # 12 | # 13 |
|------------------|-----|-----|-----|-----|-----|-----|-----|-----|-----|------|------|------|------|
| Number of fruits | 10  | 10  | 10  | 10  | 10  | 10  | 4   | 4   | 10  | 1    | 2    | 10   | 10   |
| ATL buffer (μL)  | 900 | 900 | 900 | 900 | 900 | 900 | 900 | 900 | 900 | 180  | 180  | 900  | 900  |

[illegible]
